# Supplementary material
Source: PubMed Central journal article supplement (PMC7566555)
Supplement: NIHMS1551969-supplement-1.pdf [file NIHMS1551969-supplement-1.pdf]

## Supporting Information

**Non-mulberry Silk Based Ink for Fabricating Mechanically Robust Cardiac Patches and Endothelialized Myocardium-on-a-chip Application**

*Shreya Mehrotra, Bruna A. G. de Melo, Minoru Hirano, Wendy Keung, Ronald A. Li, Biman B. Mandal\*, Su Ryon Shin \**

**Table S1. List of primers used for gene expression analysis**

| Gene                           | Sequence                                                                     |
|--------------------------------|------------------------------------------------------------------------------|
| Rat GAPDH                      | F-5'-ATGCTGGTGCTGAGTATGTC-3'<br>R-5'-AGTTGTCATATTTCTCGTGG-3'                 |
| Rat Connexin 43 (Gja1)         | F-5'-AGGAGTTCCACCAACTTTGGC-3'<br>R-5-TGGAGTAGGCTTGGACCTTGTC-3'               |
| Rat Actinin (Actn1)            | F-5'-TAACCCAAGCTGATGAGGCAGGCTT -3'<br>R-5-TTCCAATCCTTCATCGACTTCATGAC -3'     |
| Rat Cardiac Troponin T (Tnni3) | F-5'- GATCTCGCCCCTTATCTCAGTGTCCTCA-3'<br>R-5-GATCTGAGGACACTGAGATAAGGGGCGA-3' |
| Human Cardiac Troponin T       | F-5'- GGCAGCGGAAGAGGATGCTGAA-3'<br>R-5- GAGGCACCAAGTTGGGCATGAACGA-3'         |
| Human GAPDH                    | F-5'AGCCACATCGCTCAGACACC-3'<br>F-5'GTACTCAGCGCCAGCATCG-3'                    |
